# Supplementary material for: Cultivation of marine bacteria of the SAR202 clade
Source: PubMed Central journal article supplement (PMC10444878; doi:10.1038/s41467-023-40726-8), 2023-08-22
Supplement: 41467_2023_40726_MOESM3_ESM.pdf [file 41467_2023_40726_MOESM3_ESM.pdf]

## **Description of Additional Supplementary Files:**

**Supplementary Data 1:** Information on the metabolic pathway steps of strain JH545 indicated by the numbers in Fig. 3.

**Supplementary Data 2:** Metagenome samples used in fragment recruitment (Fig. 6).
