# Supplementary material for: Cultivation of marine bacteria of the SAR202 clade
Source: PubMed Central journal article supplement (PMC10444878; doi:10.1038/s41467-023-40726-8), 2023-08-22
Supplement: 41467_2023_40726_MOESM6_ESM.pdf [file 41467_2023_40726_MOESM6_ESM.pdf]

## Reporting Summary

Nature Portfolio wishes to improve the reproducibility of the work that we publish. This form provides structure for consistency and transparency in reporting. For further information on Nature Portfolio policies, see our [Editorial Policies](#) and the [Editorial Policy Checklist](#).

### Statistics

For all statistical analyses, confirm that the following items are present in the figure legend, table legend, main text, or Methods section.

n/a Confirmed

- |                                     |                                     |                                                                                                                                                                                                                                                            |
|-------------------------------------|-------------------------------------|------------------------------------------------------------------------------------------------------------------------------------------------------------------------------------------------------------------------------------------------------------|
| <input type="checkbox"/>            | <input checked="" type="checkbox"/> | The exact sample size ( $n$ ) for each experimental group/condition, given as a discrete number and unit of measurement                                                                                                                                    |
| <input type="checkbox"/>            | <input checked="" type="checkbox"/> | A statement on whether measurements were taken from distinct samples or whether the same sample was measured repeatedly                                                                                                                                    |
| <input type="checkbox"/>            | <input checked="" type="checkbox"/> | The statistical test(s) used AND whether they are one- or two-sided<br><i>Only common tests should be described solely by name; describe more complex techniques in the Methods section.</i>                                                               |
| <input checked="" type="checkbox"/> | <input type="checkbox"/>            | A description of all covariates tested                                                                                                                                                                                                                     |
| <input checked="" type="checkbox"/> | <input type="checkbox"/>            | A description of any assumptions or corrections, such as tests of normality and adjustment for multiple comparisons                                                                                                                                        |
| <input type="checkbox"/>            | <input checked="" type="checkbox"/> | A full description of the statistical parameters including central tendency (e.g. means) or other basic estimates (e.g. regression coefficient) AND variation (e.g. standard deviation) or associated estimates of uncertainty (e.g. confidence intervals) |
| <input type="checkbox"/>            | <input checked="" type="checkbox"/> | For null hypothesis testing, the test statistic (e.g. $F$ , $t$ , $r$ ) with confidence intervals, effect sizes, degrees of freedom and $P$ value noted<br><i>Give <math>P</math> values as exact values whenever suitable.</i>                            |
| <input checked="" type="checkbox"/> | <input type="checkbox"/>            | For Bayesian analysis, information on the choice of priors and Markov chain Monte Carlo settings                                                                                                                                                           |
| <input checked="" type="checkbox"/> | <input type="checkbox"/>            | For hierarchical and complex designs, identification of the appropriate level for tests and full reporting of outcomes                                                                                                                                     |
| <input checked="" type="checkbox"/> | <input type="checkbox"/>            | Estimates of effect sizes (e.g. Cohen's $d$ , Pearson's $r$ ), indicating how they were calculated                                                                                                                                                         |

*Our web collection on [statistics for biologists](#) contains articles on many of the points above.*

### Software and code

Policy information about [availability of computer code](#)

|                 |                                                                                                                                                                                                                                                                                                                                                                                                                                                                                                                                                                                                                                                                                                                                                                                                                                                                                                                                                                                                                                                                 |
|-----------------|-----------------------------------------------------------------------------------------------------------------------------------------------------------------------------------------------------------------------------------------------------------------------------------------------------------------------------------------------------------------------------------------------------------------------------------------------------------------------------------------------------------------------------------------------------------------------------------------------------------------------------------------------------------------------------------------------------------------------------------------------------------------------------------------------------------------------------------------------------------------------------------------------------------------------------------------------------------------------------------------------------------------------------------------------------------------|
| Data collection | Cell counts of the growth experiments were obtained using Guava CytoSoft (v5.3).                                                                                                                                                                                                                                                                                                                                                                                                                                                                                                                                                                                                                                                                                                                                                                                                                                                                                                                                                                                |
| Data analysis   | Prokka (v1.12); IMG-ER ( <a href="https://img.jgi.doe.gov/cgi-bin/mer/main.cgi">https://img.jgi.doe.gov/cgi-bin/mer/main.cgi</a> ); eggnog-mapper (v2.0.1); hmmsearch (v3.3); dbCAN2 ( <a href="http://cys.bios.niu.edu/dbCAN2">http://cys.bios.niu.edu/dbCAN2</a> ); IslandViewer 4 ( <a href="https://www.pathogenomics.sfu.ca/islandviewer/">https://www.pathogenomics.sfu.ca/islandviewer/</a> ); GTDB-Tk (v1.7.0); Mothur software package (v1.39.5); SINA online aligner (v1.2.11, <a href="http://www.arb-silva.de/aligner">http://www.arb-silva.de/aligner</a> ); MEGA software (v7.0); iTOL ( <a href="https://itol.embl.de/">https://itol.embl.de/</a> ); RAxML (v8.2.12); R environment (v4.0.2); R packages (tidyverse v1.3.2, ggplot2 v3.3.6, viridis v0.6.2, and patchwork v1.1.2); BioRender ( <a href="https://biorender.com">https://biorender.com</a> ); Cytoscape (v3.7.2); Enzyme Similarity Tool (EFI-EST; <a href="https://efi.igb.illinois.edu/efi-est/">https://efi.igb.illinois.edu/efi-est/</a> ); Cutadapt (v2.7); QIIME2 (v2020.11) |

For manuscripts utilizing custom algorithms or software that are central to the research but not yet described in published literature, software must be made available to editors and reviewers. We strongly encourage code deposition in a community repository (e.g. GitHub). See the Nature Portfolio [guidelines for submitting code & software](#) for further information.

### Data

Policy information about [availability of data](#)

All manuscripts must include a [data availability statement](#). This statement should provide the following information, where applicable:

- Accession codes, unique identifiers, or web links for publicly available datasets
- A description of any restrictions on data availability
- For clinical datasets or third party data, please ensure that the statement adheres to our [policy](#)

All relevant data supporting the findings of this study are available within the paper and its supplementary information and data files. Source data are provided

with this paper. The 16S rRNA gene sequences of 24 isolates in SAR202 group I generated in this study have been deposited in the GenBank database under accession numbers OQ689977–OQ690000 [https://www.ncbi.nlm.nih.gov/nuccore/OQ689977.1/–https://www.ncbi.nlm.nih.gov/nuccore/OQ690000.1]. The whole genome sequences have been deposited in the GenBank database under accession numbers CP046146 (JH545) [https://www.ncbi.nlm.nih.gov/nuccore/CP046146.1/], CP046147 (JH1073) [https://www.ncbi.nlm.nih.gov/nuccore/CP046147.1/], WMBD00000000 (JH639) [https://www.ncbi.nlm.nih.gov/nuccore/WMBD00000000.1/], and WMBE00000000 (JH702) [https://www.ncbi.nlm.nih.gov/nuccore/WMBE00000000.1/]. The genomic data are also available at IMG/M database with genome IDs 2901382945 (JH545) [https://img.jgi.doe.gov/cgi-bin/mer/main.cgi?section=TaxonDetail&page=taxonDetail&taxon\_oid=2901382945], 2917498938 (JH1073) [https://img.jgi.doe.gov/cgi-bin/mer/main.cgi?section=TaxonDetail&page=taxonDetail&taxon\_oid=2917498938], 2892960865 (JH639) [https://img.jgi.doe.gov/cgi-bin/mer/main.cgi?section=TaxonDetail&page=taxonDetail&taxon\_oid=2892960865], and 2892963810 (JH702) [https://img.jgi.doe.gov/cgi-bin/mer/main.cgi?section=TaxonDetail&page=taxonDetail&taxon\_oid=2892963810].

## Research involving human participants, their data, or biological material

Policy information about studies with [human participants or human data](#). See also policy information about [sex, gender \(identity/presentation\), and sexual orientation](#) and [race, ethnicity and racism](#).

|                                                                    |                |
|--------------------------------------------------------------------|----------------|
| Reporting on sex and gender                                        | Not applicable |
| Reporting on race, ethnicity, or other socially relevant groupings | Not applicable |
| Population characteristics                                         | Not applicable |
| Recruitment                                                        | Not applicable |
| Ethics oversight                                                   | Not applicable |

Note that full information on the approval of the study protocol must also be provided in the manuscript.

## Field-specific reporting

Please select the one below that is the best fit for your research. If you are not sure, read the appropriate sections before making your selection.

Life sciences  Behavioural & social sciences  Ecological, evolutionary & environmental sciences

For a reference copy of the document with all sections, see [nature.com/documents/nr-reporting-summary-flat.pdf](https://www.nature.com/documents/nr-reporting-summary-flat.pdf)

## Life sciences study design

All studies must disclose on these points even when the disclosure is negative.

|                 |                                                                                                                                                                                                                                                                                                                                                                                                                                                                                                                       |
|-----------------|-----------------------------------------------------------------------------------------------------------------------------------------------------------------------------------------------------------------------------------------------------------------------------------------------------------------------------------------------------------------------------------------------------------------------------------------------------------------------------------------------------------------------|
| Sample size     | No statistical methods were used to determine sample sizes. The experiments presented in Fig. 2c, Fig. 5, and Supplementary Fig. 3 were performed in three or two biological replicates, based on previous similar studies and practical consideration. The other experiments presented in Fig. 2a-b (growth curves of the four strains), Supplementary Table 4 (cellular fatty acid composition), and Supplementary Fig. 2 (microbial community structure of the seawater samples) were analyzed without replicates. |
| Data exclusions | No data were excluded from the analyses.                                                                                                                                                                                                                                                                                                                                                                                                                                                                              |
| Replication     | The experiments presented in Fig. 2c, Fig. 5, and Supplementary Fig. 3 were performed in three or two biological replicates. All attempts at replication were successful.                                                                                                                                                                                                                                                                                                                                             |
| Randomization   | Randomization was not required in this study, because all samples (replicates) and data were analyzed and reported without subsampling or exclusion.                                                                                                                                                                                                                                                                                                                                                                  |
| Blinding        | Blinding was not relevant to this study, because all findings and conclusions of this study were based on objective (quantitative) measurements and analyses which did not allow for subjective judgment.                                                                                                                                                                                                                                                                                                             |

## Reporting for specific materials, systems and methods

We require information from authors about some types of materials, experimental systems and methods used in many studies. Here, indicate whether each material, system or method listed is relevant to your study. If you are not sure if a list item applies to your research, read the appropriate section before selecting a response.

## Materials & experimental systems

| n/a                                 | Involvement in the study                               |
|-------------------------------------|--------------------------------------------------------|
| <input checked="" type="checkbox"/> | <input type="checkbox"/> Antibodies                    |
| <input checked="" type="checkbox"/> | <input type="checkbox"/> Eukaryotic cell lines         |
| <input checked="" type="checkbox"/> | <input type="checkbox"/> Palaeontology and archaeology |
| <input checked="" type="checkbox"/> | <input type="checkbox"/> Animals and other organisms   |
| <input checked="" type="checkbox"/> | <input type="checkbox"/> Clinical data                 |
| <input checked="" type="checkbox"/> | <input type="checkbox"/> Dual use research of concern  |
| <input checked="" type="checkbox"/> | <input type="checkbox"/> Plants                        |

## Methods

| n/a                                 | Involvement in the study                        |
|-------------------------------------|-------------------------------------------------|
| <input checked="" type="checkbox"/> | <input type="checkbox"/> ChIP-seq               |
| <input checked="" type="checkbox"/> | <input type="checkbox"/> Flow cytometry         |
| <input checked="" type="checkbox"/> | <input type="checkbox"/> MRI-based neuroimaging |
